# Supplementary material for: Prevalence of and factors associated with osteoarthritis and pain in retired Olympians compared with the general population: part 1 – the lower limb
Source: HighWire-hosted journal article supplement (doi:10.1136/bjsports-2021-104762), 2022-08-05
Supplement: bjsports-2021-104762supp005_data_supplement.pdf [file bjsports-2021-104762supp005_data_supplement.pdf]

**Appendix 5. Factors associated with hip pain in Olympians and general population control**

|                      | Olympians           |                                     | Controls            |                                     |
|----------------------|---------------------|-------------------------------------|---------------------|-------------------------------------|
|                      | Prevalence<br>n (%) | aOR (95% CI)<br>adjusted a, s, b, i | Prevalence<br>n (%) | aOR (95% CI)<br>adjusted a, s, b, i |
| <b>Age</b>           |                     |                                     |                     |                                     |
| 20-39                | 63/1194 (5.28)      | 1.00 (reference)                    | 30/776 (3.87)       | 1.00 (reference)                    |
| 40-59                | 80/1359 (5.89)      | 1.36 (0.04 to 1.96)                 | 32/646 (4.95)       | 1.28 (0.75 to 2.20)                 |
| >60                  | 37/580 (6.38)       | 1.78 (1.13 to 2.82)                 | 15/212 (7.08)       | 1.94 (0.97 to 3.89)                 |
| <b>Sex</b>           |                     |                                     |                     |                                     |
| male                 | 84/1840 (4.57)      | 1.00 (reference)                    | 26/723 (3.6)        | 1.00 (reference)                    |
| female               | 102/1488 (6.85)     | <b>1.65 (1.18 to 2.31)</b>          | 52/998 (5.21)       | 1.84 (1.10 to 3.08)                 |
| <b>BMI</b>           |                     |                                     |                     |                                     |
| normal               | 94/1774 (5.3)       | 1.00 (reference)                    | 36/981 (3.67)       | 1.00 (reference)                    |
| overweight           | 65/1063 (6.11)      | 1.34 (0.93 to 1.93)                 | 24/457 (5.25)       | 1.65 (0.95 to 2.86)                 |
| obese                | 19/342 (5.56)       | 1.26 (0.74 to 2.16)                 | 11/190 (5.79)       | 1.51 (0.74 to 3.11)                 |
| <b>Hip injury</b>    |                     |                                     |                     |                                     |
| no                   | 145/3221 (4.50)     | 1.00 (reference)                    | 67/1674 (4.00)      | 1.00 (reference)                    |
| yes                  | 42/136 (30.88)      | <b>9.76 (6.39 to 14.93)</b>         | 12/61 (19.67)       | <b>6.95 (3.39 to 14.24)</b>         |
| <b>Comorbidities</b> |                     |                                     |                     |                                     |
| none                 | 109/2379 (4.58)     | 1.00 (reference)                    | 42/1263 (3.33)      | 1.00 (reference)                    |
| 1                    | 55/696 (7.9)        | <b>1.49 (1.03 to 2.15)</b>          | 21/336 (6.25)       | <b>1.65 (0.92 to 2.96)</b>          |
| 2 or more            | 23/282 (8.16)       | <b>1.71 (1.02 to 2.88)</b>          | 16/136 (11.76)      | <b>3.53 (1.82 to 6.83)</b>          |

(Values are presented as count (n) and prevalence (%). aOR adjusted a, s, b, I = odds ratio adjusted for confounders age, sex, BMI and injury. BMI = body mass index. Bold denotes statistical significance.)
